# Supplementary material for: Barrier effect of coal bottom ash-based geopolymers on soil contaminated by heavy metals
Source: Royal Society of Chemistry journal article supplement (doi:10.1039/c9ra05542h), 2019-01-01
Supplement: c9ra05542h1.pdf [file c9ra05542h1.pdf]

## **Barrier effect of coal bottom ash-based geopolymers on soil contaminated by heavy metals**

*Yiqie Dong<sup>1</sup>, Min Zhou<sup>1,2</sup>, Yuwei Xiang<sup>1</sup>, Sha Wan<sup>1</sup>, He Li<sup>1</sup>, Haobo Hou<sup>1,2\*</sup>*

*1. School of Resource and Environmental Sciences, Wuhan University, Wuhan, China*

*2. Hubei Environmental Remediation Material Engineering Technology Research*

*Center, Wuhan, China*

*\*corresponding author, email: houhb@whu.edu.cn*

## **Supporting Information**

## Figures

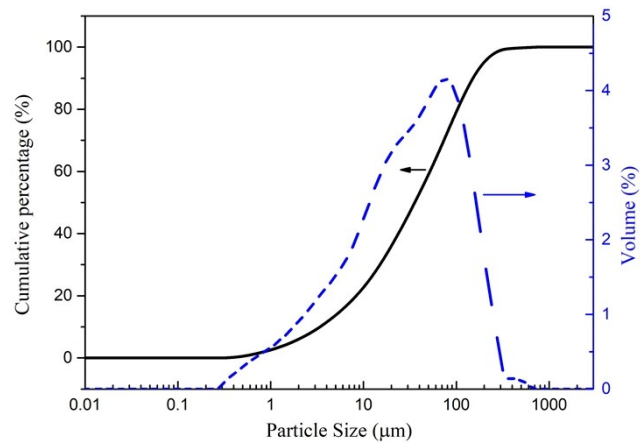

Fig. S1 Particle size distribution of CBA

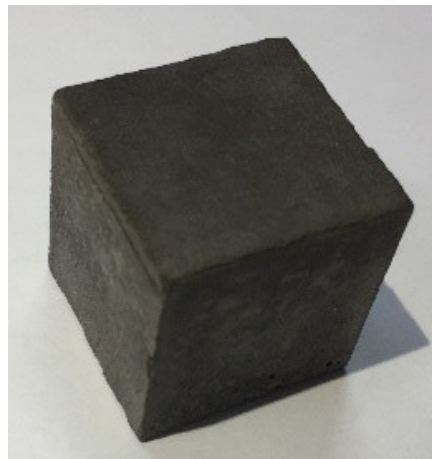

Fig. S2 Geopolymer of S1

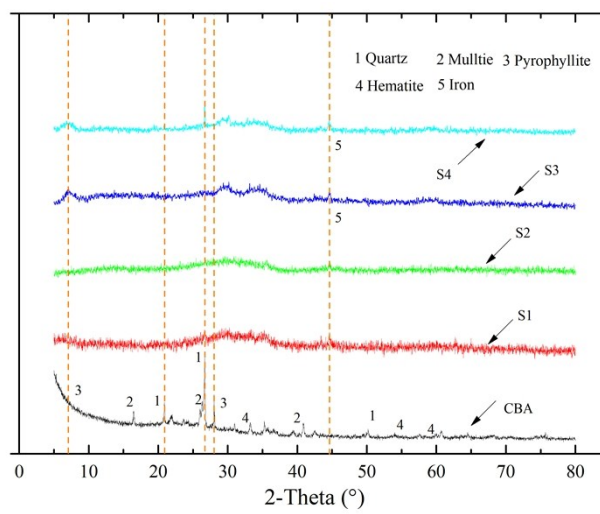

Fig. S3 XRD diagram of solidified geopolymers

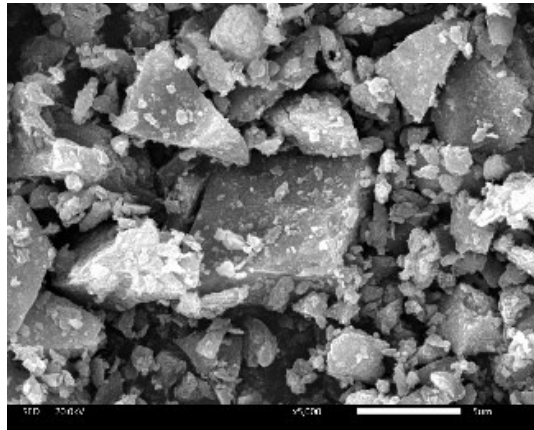

(CBA)

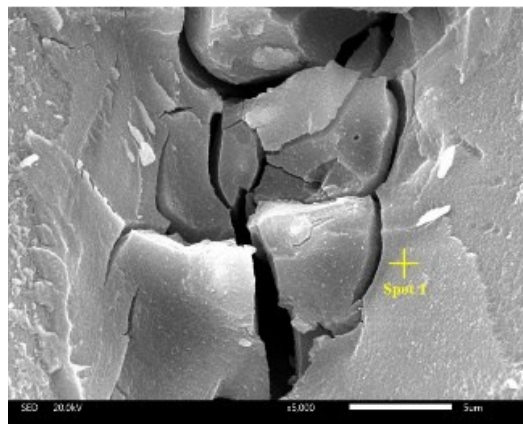

(S1)

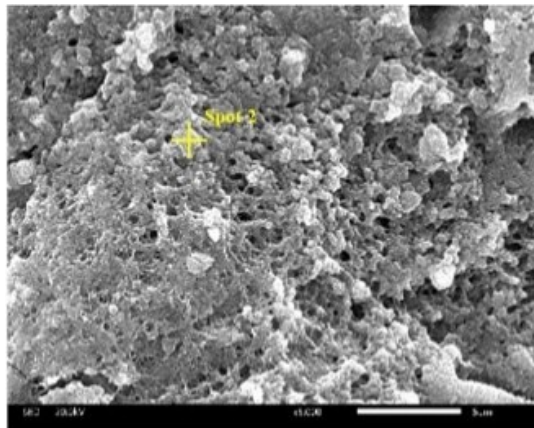

(S4)

Fig. S4 Micromorphology of CBA and geopolymers (5000 times)

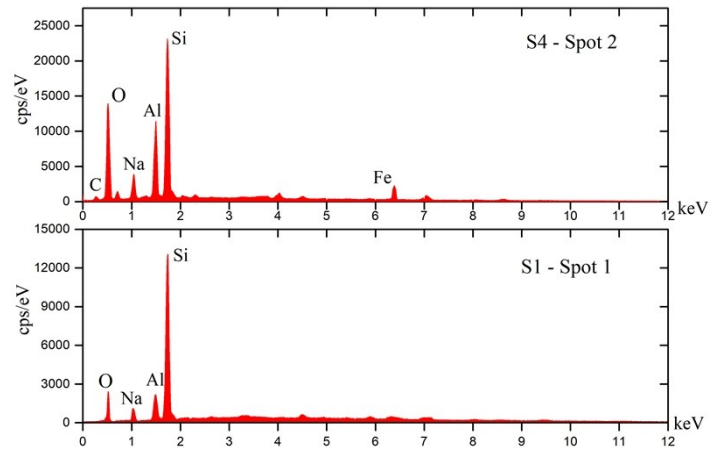

Fig. S5 Energy spectrum curves of characteristic points in S1 and S4

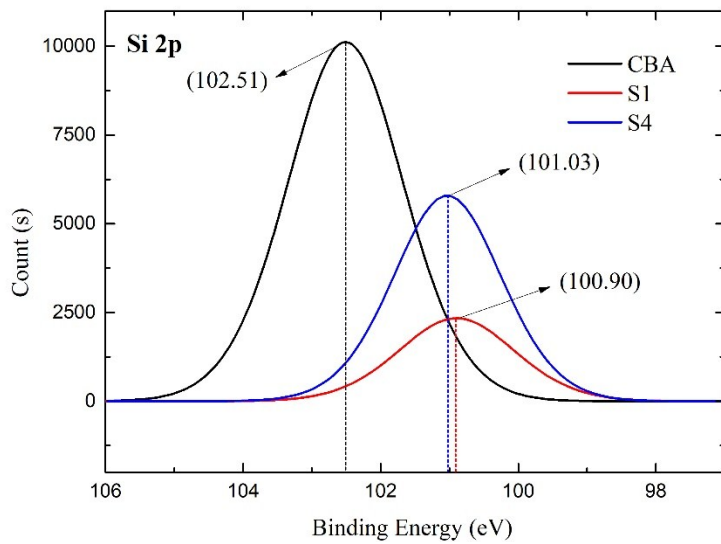

(a)

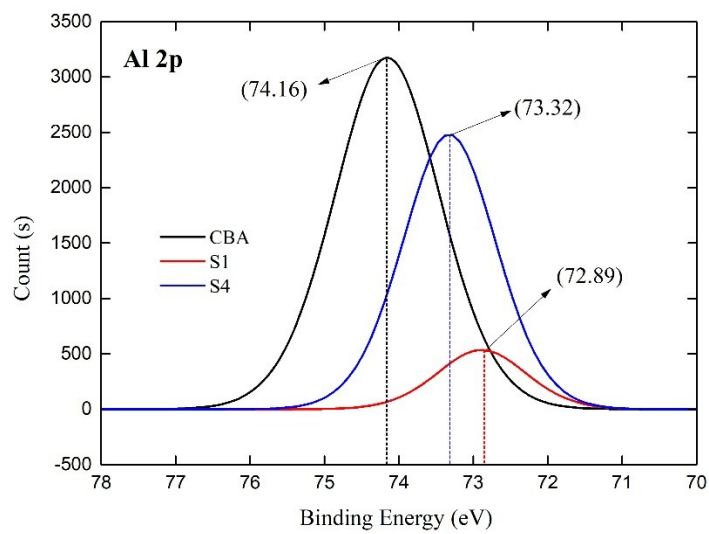

(b)

Fig. S6 Si 2p and Al 2p binding energies of CBA and geopolymers

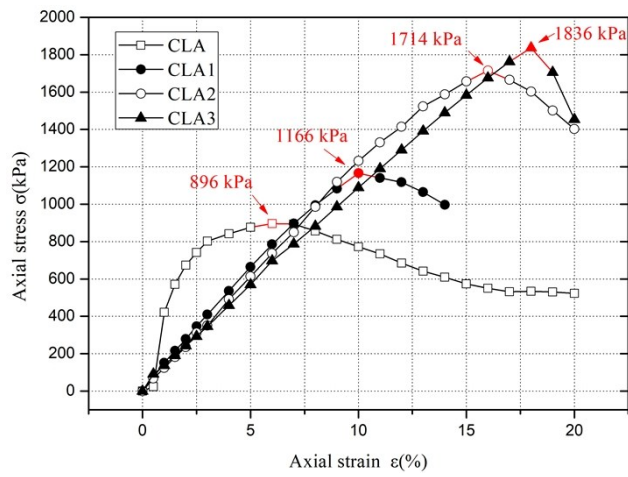

(a)

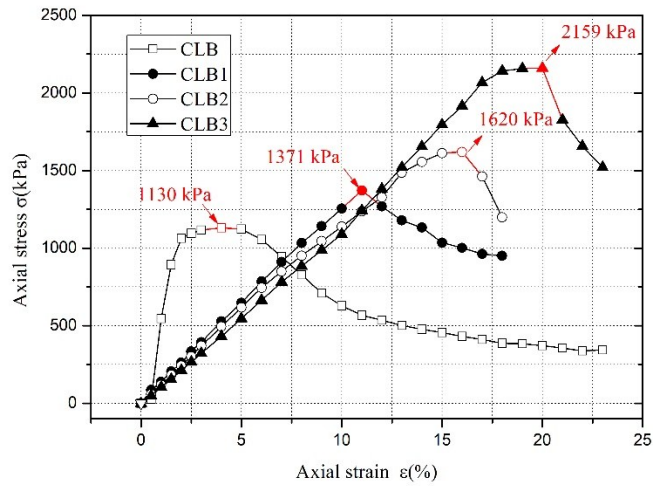

(b)

Fig. S7 Stress-strain curve of CLA, CLB, and remolded soils

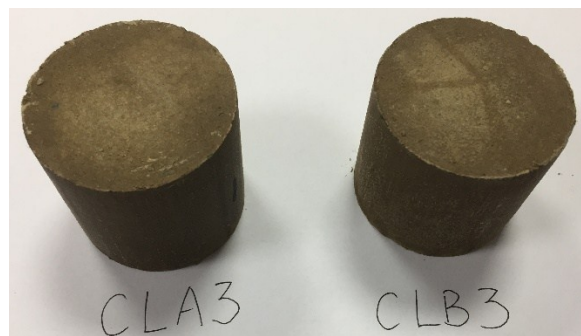

Fig. S8 CLA3 and CLB3

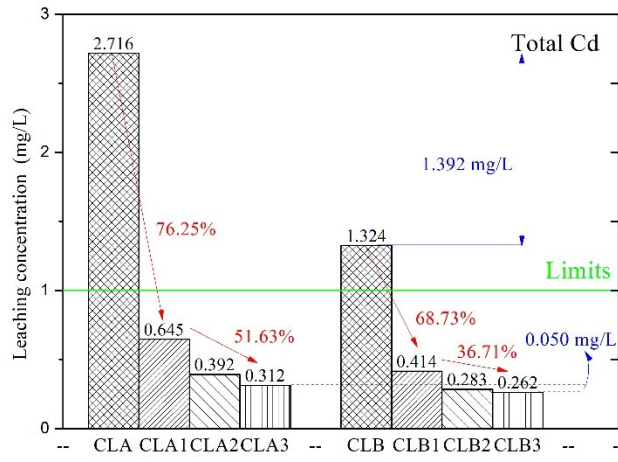

(a)

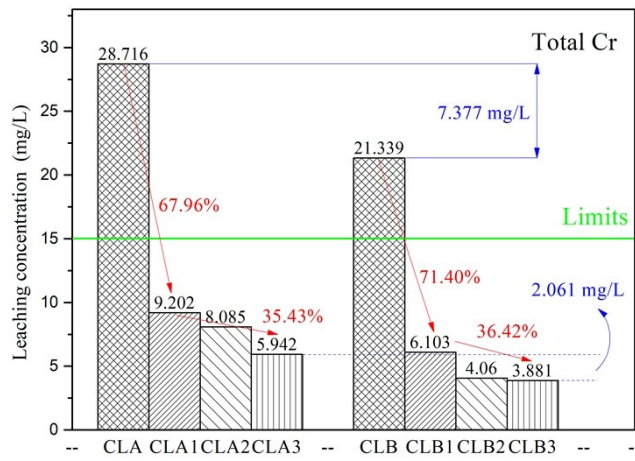

(b)

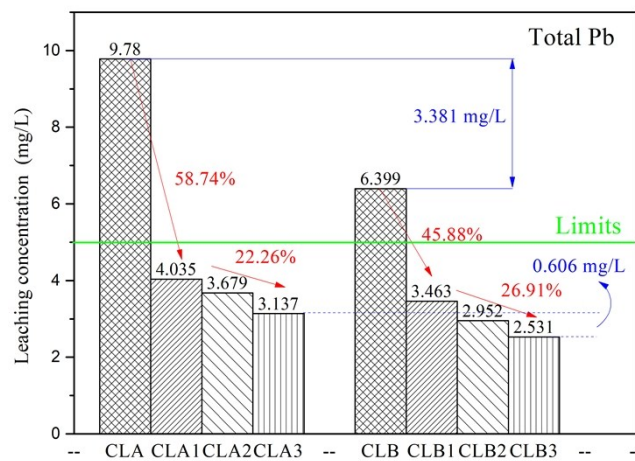

(c)

Fig. S9 Leaching concentration of heavy metals in undisturbed and remolded soils

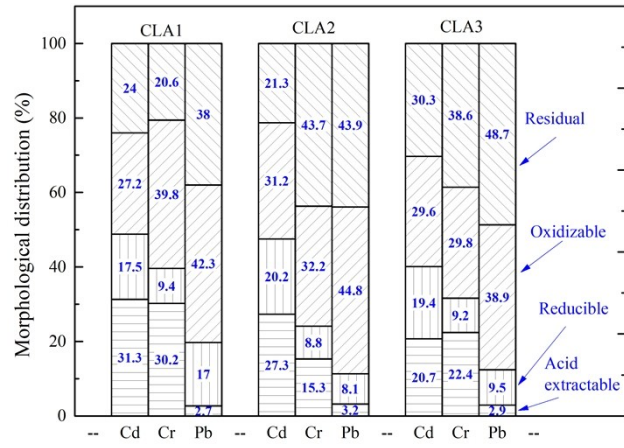

(a)

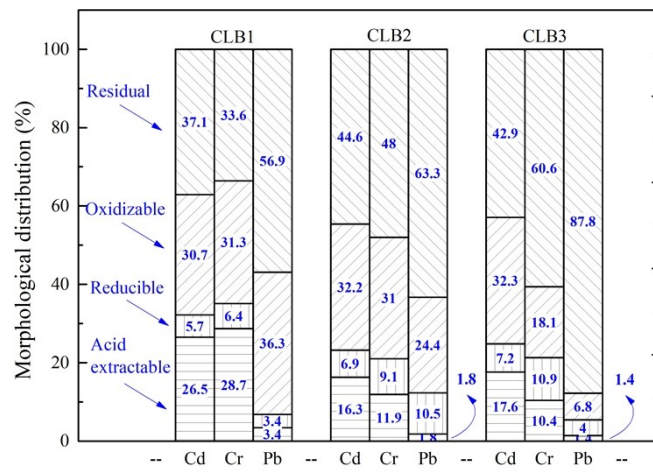

(b)

Fig. S10 Chemical fraction distribution of remolded soils

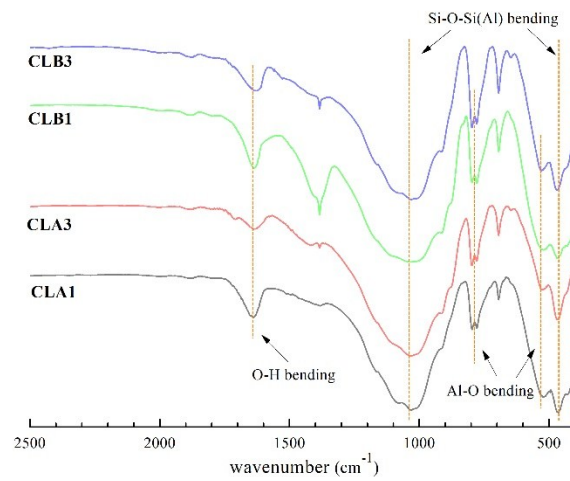

Fig. S11 IR spectrum of remolded soils



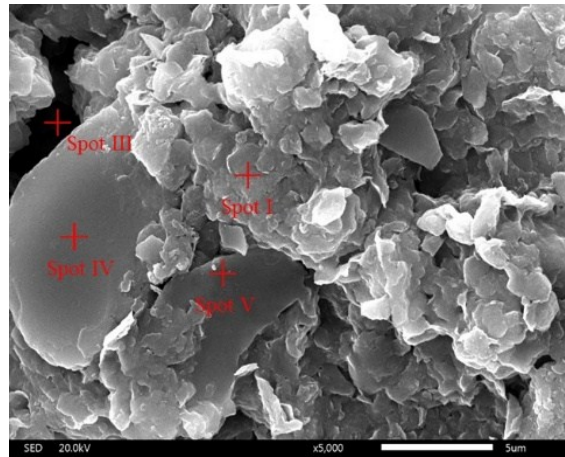

(a) CLA1

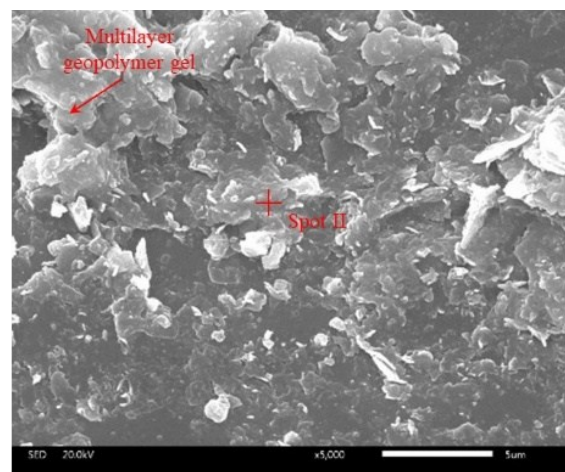

(b) CLA3

Fig. S12 Micromorphology of remolded soils (5000 times)

**Tables:**

Table S1 Chemical compositions of CBA

|     | SiO <sub>2</sub> | Al <sub>2</sub> O <sub>3</sub> | Fe <sub>2</sub> O <sub>3</sub> | K <sub>2</sub> O | CaO  | MgO  | Loss |
|-----|------------------|--------------------------------|--------------------------------|------------------|------|------|------|
| CBA | 59.93            | 22.98                          | 7.90                           | 1.74             | 2.16 | 1.28 | 4.01 |

Table S2 Content of heavy metals in soil (mg/kg)

(ND: No heavy metal was detected.)

| Content | Cd   | Hg  | As  | Cu   | Pb   | Cr   | Zn   | Ni |
|---------|------|-----|-----|------|------|------|------|----|
| CLA     | 58.4 | 0.2 | 7.3 | 25.9 | 1817 | 1365 | 462  | ND |
| CLB     | 31.6 | ND  | 3.6 | 33.7 | 672  | 794  | 71.3 | ND |

Table S3 Experimental range and levels of independent variables

| Variable                           | Symbols | Range and levels |     |     |
|------------------------------------|---------|------------------|-----|-----|
|                                    | Coded   | -1               | 0   | 1   |
| $n(\text{Si}):n(\text{Al})$        | X1      | 2                | 2.4 | 2.7 |
| $n(\text{Na}):n(\text{Al})$        | X2      | 0.6              | 0.7 | 0.8 |
| $n(\text{Water}):n(\text{Binder})$ | X3      | 2                | 2.4 | 2.8 |



Table S4 Contents of geopolymers and HMS in remolded soils (%)

| Content    | CLA1 | CLA2 | CLA3 | CLB1 | CLB2 | CLB3 |
|------------|------|------|------|------|------|------|
| Geopolymer | 10   | 20   | 30   | 10   | 20   | 30   |
| CLA        | 90   | 80   | 70   | 0    | 0    | 0    |
| CLB        | 0    | 0    | 0    | 90   | 80   | 70   |

Table S5 The procedure of chemical fraction distribution

| Fractions                 | Operating scheme                                                                                                                                                                                                                                                                                                      |
|---------------------------|-----------------------------------------------------------------------------------------------------------------------------------------------------------------------------------------------------------------------------------------------------------------------------------------------------------------------|
| Step 1 (Acid extractable) | 0.5 g samples were continuously shaken for 16 h at 25 °C with 20 ml of 0.1 mol/L HAc.                                                                                                                                                                                                                                 |
| Step 2 (Reducible)        | The residual was continuously shaken for 16 h at 25 °C with 20 ml of 0.5 mol/L NH <sub>2</sub> OH·HCl.                                                                                                                                                                                                                |
| Step 3 (Oxidizable)       | The residual was added in 5 ml of 30% H <sub>2</sub> O <sub>2</sub> , and was heated to 85 °C in a water bath for 1 h with 5 ml of 30% H <sub>2</sub> O <sub>2</sub> an hour later, 25 ml of 1 mol/L NH <sub>4</sub> Ac was added to the cooled sample at 25 °C, Continuous shaking was maintained for 16 h at 25 °C. |
| Step 4 (Residual)         | The residual was digested using a mixture of HNO <sub>3</sub> , HF and HCl in a 3:1:1 ratio.                                                                                                                                                                                                                          |
